# Supplementary material for: RETRACTED: Quantitative analysis and visualization of literature on acupuncture and related TCM therapies for the treatment of colorectal cancer based on CiteSpace
Source: Frontiers journal article supplement (doi:10.3389/fonc.2023.1290588), 2024-01-05
Supplement: Table_1.XLSX [file Table_1.XLSX]

## Sheet: Sheet1
Year	WoS	Chinese databases	Year	WoS	Chinese databases
1993		1	2013	13	2
2004	1		2014	12	2
2004	1		2015	13	2
2006	1		2016	14	3
2006	1		2017	17	11
2007	1		2018	17	6
2008	2		2019	31	10
2009	1		2020	36	15
2010		3	2021	37	14
2011	3	6	2022	55	10
2012	4		2023	33	10
