# Supplementary material for: RETRACTED: Quantitative analysis and visualization of literature on acupuncture and related TCM therapies for the treatment of colorectal cancer based on CiteSpace
Source: Frontiers journal article supplement (doi:10.3389/fonc.2023.1290588), 2024-01-05
Supplement: Table_2.XLSX [file Table_2.XLSX]

## Sheet: Sheet1
Top 22 authors from WoS				Top 22 authors from Chinese databases
Count	Name	Count	Name	Count	Name	Count	Name
9	Li Qi	5	Ji Qing	4	MENG Jinhai	2	XIE Xiaohua
7	Wang Yan	5	Zhou Minfeng	4	MAI Sicong	2	LANG Shuhui
7	Chen Youqin	4	Hu Man	3	GU Xuying	2	WANG Tianyuan
6	Shen Aling	4	Liu Hui	2	ZHANG Xian	2	ZHENG Ruwen
6	Sferra Thomas J	4	Jia Ru	2	HUANG Zhanming	2	CAO Hui
6	Chen Rui	4	Hung Shih-Ya	2	ZHANG Zijing	2	WEI Lijiao
6	Peng Jun	3	Chang Hen-Hong	2	WEI Ruili	2	GAO Zhiqing
5	Liang Fengxia	3	Zhang Wei	2	XU Jizong	2	ZHANG Bo
5	Sui Hua	3	Zhang Bimeng	2	LIN Jing	2	ZHAO Lan
5	Yu Zhaomin	3	Chen Min	2	LIU Xueyan	2	LI Lan
5	Li Jinxiao	3	Li Rong	2	YAN Han	2	WANG Wenjuan
