# Supplementary material for: RETRACTED: Quantitative analysis and visualization of literature on acupuncture and related TCM therapies for the treatment of colorectal cancer based on CiteSpace
Source: Frontiers journal article supplement (doi:10.3389/fonc.2023.1290588), 2024-01-05
Supplement: Table_3.XLSX [file Table_3.XLSX]

## Sheet: Sheet1
Count	institution
9	Guangzhou University of Chinese Medicine
7	Ningxia Medical University
4	General Hospital of Ningxia Medical University
3	Nanjing University of Chinese Medicine
3	Shandong University of Traditional Chinese Medicine
2	Third Affiliated Hospital of Henan University of Traditional ChineseMedicine
2	First Affiliated Hospital of Guangzhou University of Traditional Chinese Medicine
2	Jiangsu Provincial Hospital of Chinese Medicine
2	DongFang Hospital of Beijing University of Chinese Medicine
2	The Second People's Hospital Affiliated to Fujian University of Traditional Chinese Medicine
2	Fujian University of Traditional Chinese Medicine
2	Hunan University of Chinese Medicine
2	Beijing University of Chinese Medicine
