# Supplementary material for: RETRACTED: Quantitative analysis and visualization of literature on acupuncture and related TCM therapies for the treatment of colorectal cancer based on CiteSpace
Source: Frontiers journal article supplement (doi:10.3389/fonc.2023.1290588), 2024-01-05
Supplement: Table_4.XLSX [file Table_4.XLSX]

## Sheet: Sheet1
Top 10 authors from WoS				Top 11 authors from Chinese databases
Count	Source	IF	grade of periodical	Count	Source	IF	grade of periodical
4	Acupunct Med	2.5	3	4	Shanghai Journal of Acupuncture and Moxibustion	1.317	KMCT,CSCD-E
4	JAMA Surg	16.9	1	3	Chinese Acupuncture & Moxibustion	2.509	PUK,CSCD-C,KMCT
4	Trials	2.5	3	3	Journal of Sichuan of Traditional Chinese Medicine	0.881	KMCT
3	Evid Based Complement Alternat Med	NA	NA	3	Acupuncture Research	2.756	PKU,CSCD-C,KMCT
2	BMJ Open	2.9	2	2	Journal of Liaoning University of Traditional Chinese Medicine	1.777	KMCT
2	Sci Rep	4.6	2	2	Chinese General Practice Nursing	0.318
2	Support Care Cancer	3.1	1	2	Chinese Journal of Traditional Medical Science and Technology	0.697
2	Toxins	4.2	1	2	World Chinese Medicine	2.06	KMCT
2	Medicine	1.6	3	2	Zhejiang Journal of Traditional Chinese Medicine	0.434
2	Neural Regen Res	6.1	1	2	Journal of Clinical Acupuncture and Moxibustion	1.68	KMCT
				2	Guiding Journal of Traditional Chinese Medicine and Pharmacy	1.16	KMCT
