# Supplementary material for: RETRACTED: Quantitative analysis and visualization of literature on acupuncture and related TCM therapies for the treatment of colorectal cancer based on CiteSpace
Source: Frontiers journal article supplement (doi:10.3389/fonc.2023.1290588), 2024-01-05
Supplement: Table_5.xlsx [file Table_5.xlsx]

## Sheet: Sheet1
Top 10 keywords with high frequency of occurrence from WoS						Top 10 keywords with high frequency of occurrence from and Chinese databases
Count	Centrality	Keyword	Count	Centrality	Keyword	Count	Centrality	Keyword	Count	Centrality	Keyword
182	0.48	colorectal cancer	9	0.15	alternative medicine	32	0.83	colorectal cancer	12	0.14	acupuncture and moxibustion
39	0.23	traditional Chinese medicine	2	0.15	chemotherapy	26	0.54	electroacupuncture	5	0.14	laparoscope
30	0.23	acupuncture	25	0.14	complementary	14	0.25	rectal cancer	8	0.13	colon cancer
50	0.17	apoptosis	7	0.14	activation	4	0.19	immunologic function	5	0.12	acupuncture therapy
27	0.15	mortality	31	0.12	Colon cancer	17	0.14	gastrointestinal function	8	0.1	acupuncture
